# Supplementary material
Source: PubMed Central journal article supplement (PMC5766951)
Supplement: 10.1074_C117.815845_jbc.C117.815845-1.pdf [file 10.1074_C117.815845_jbc.C117.815845-1.pdf]

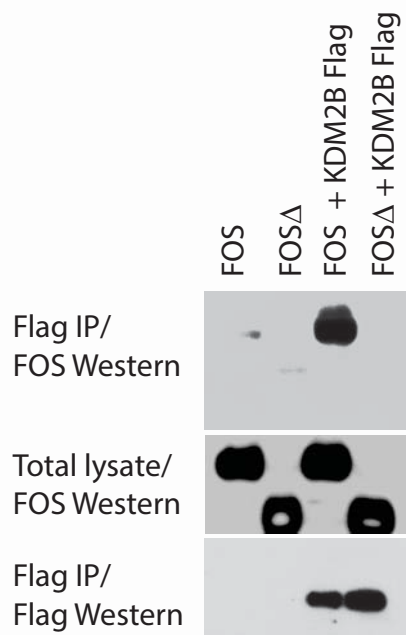

# Supplementary Fig 2 JBC/2017/815845

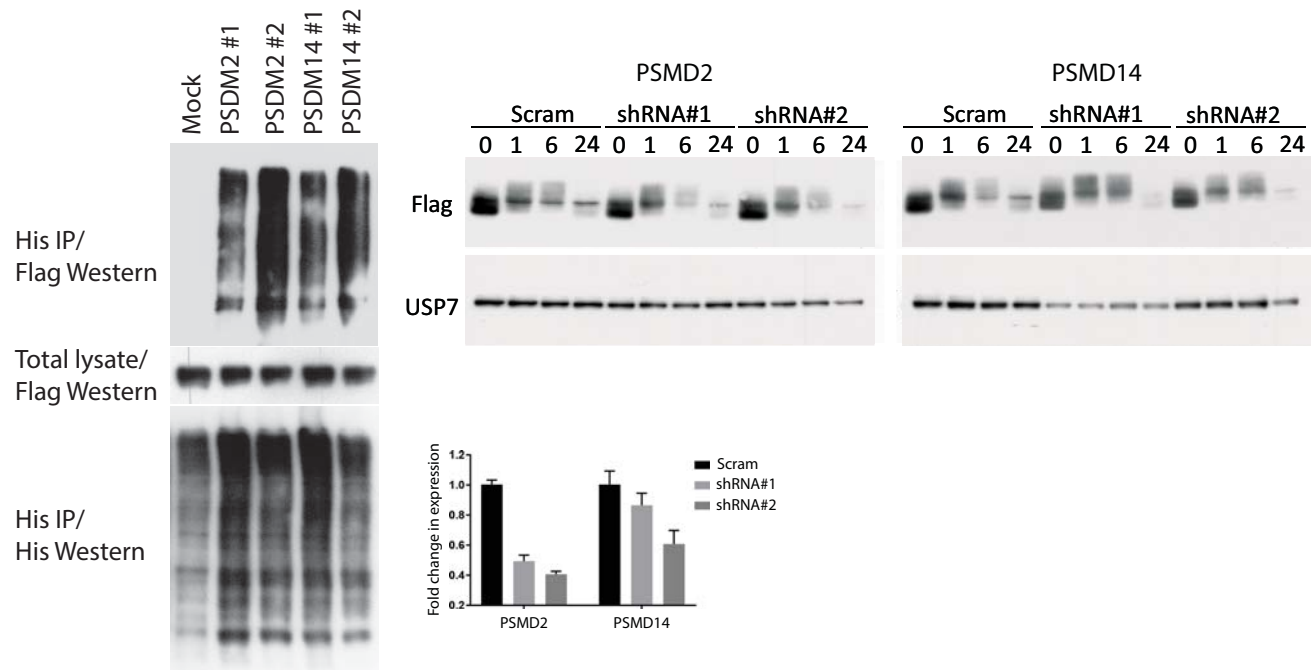

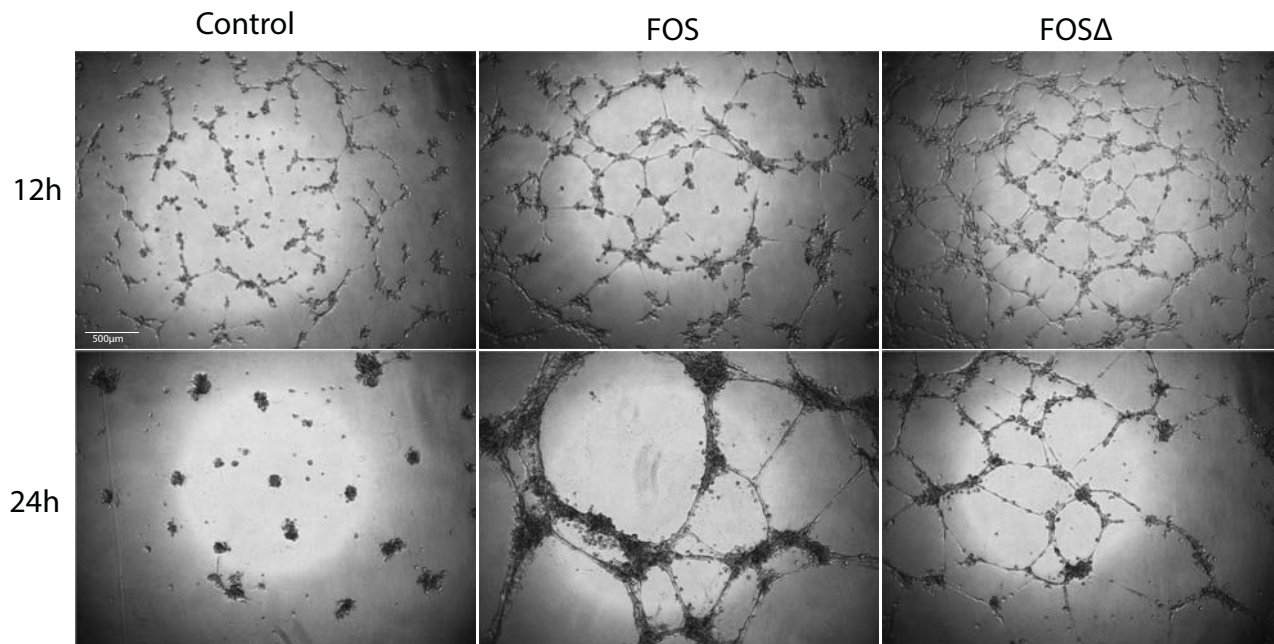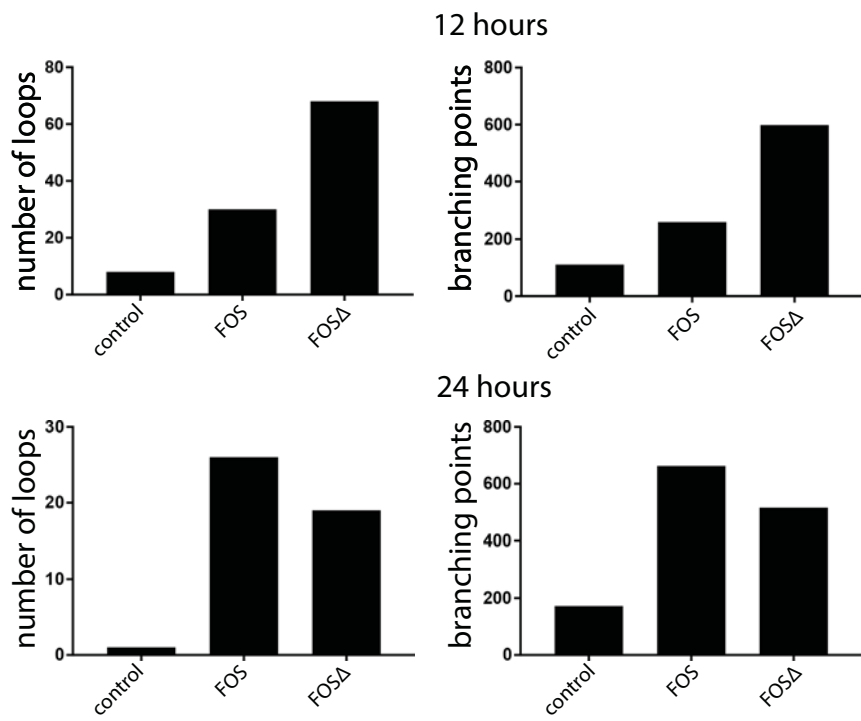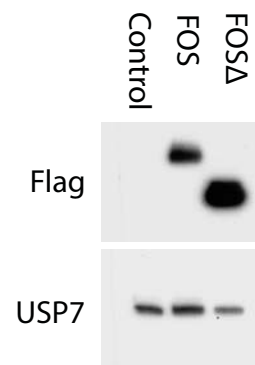

## MMP10

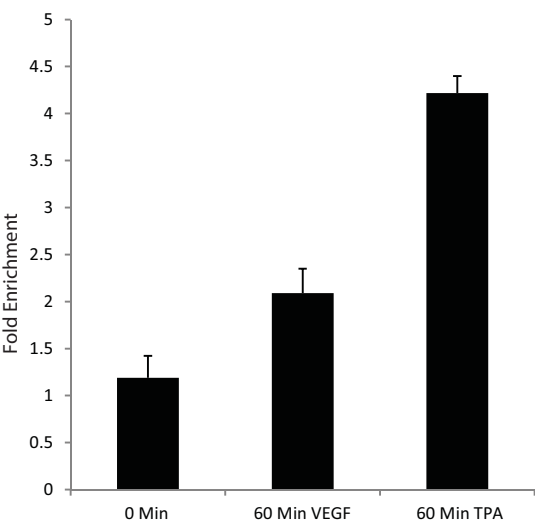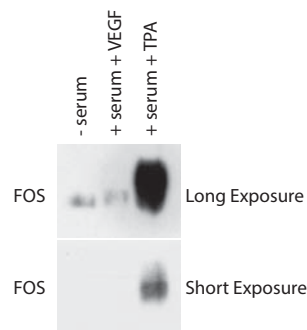

## MMP1

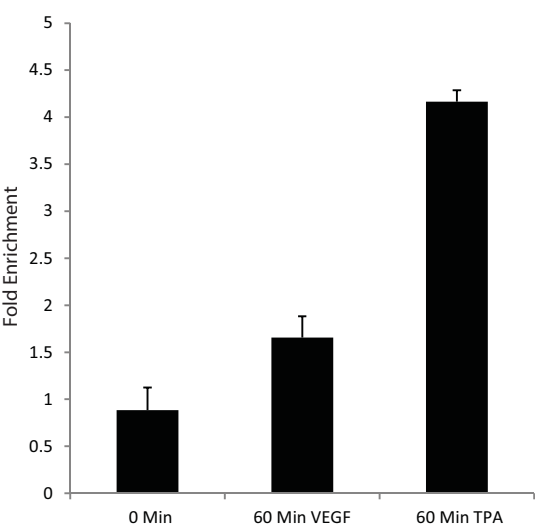

## Jag1

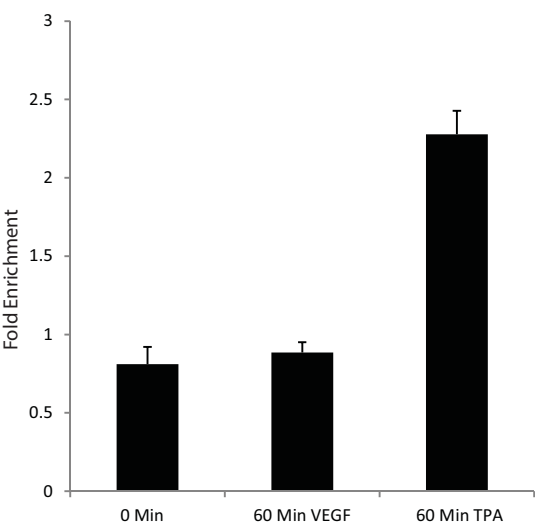

Control

T-5224

Fos $\Delta$

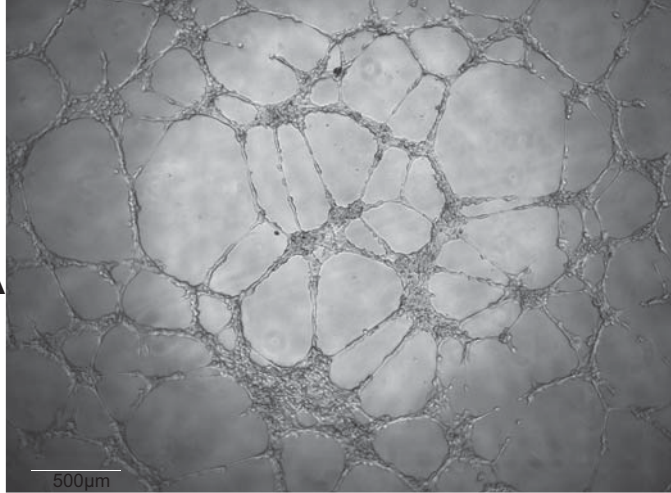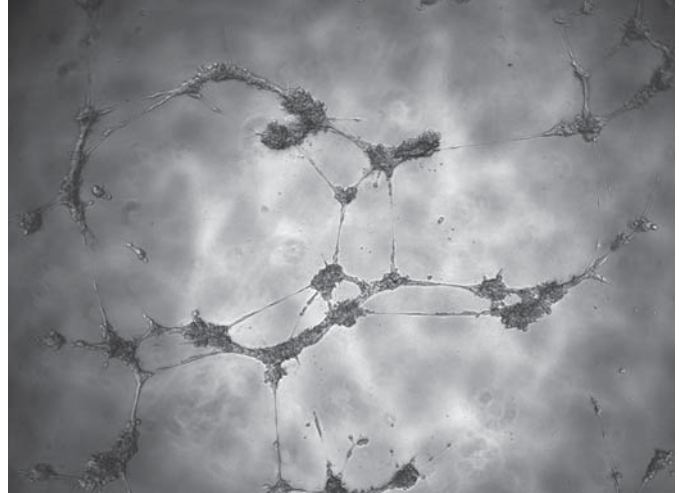

Fos

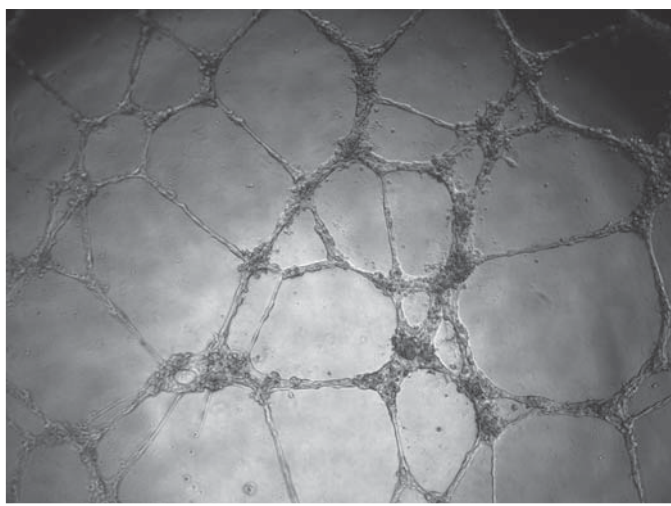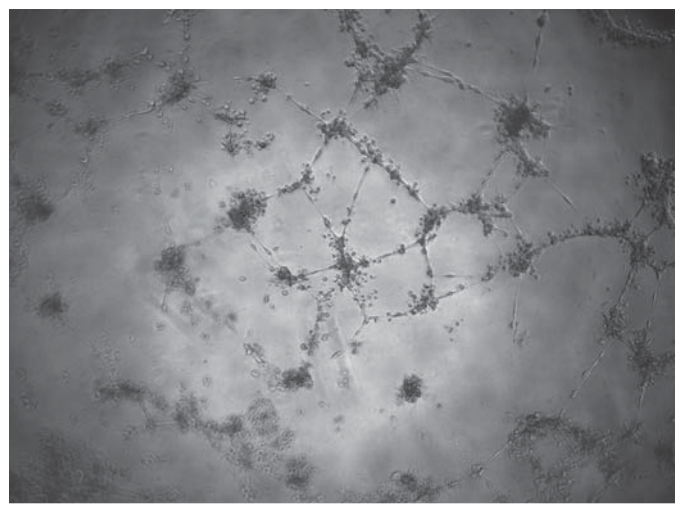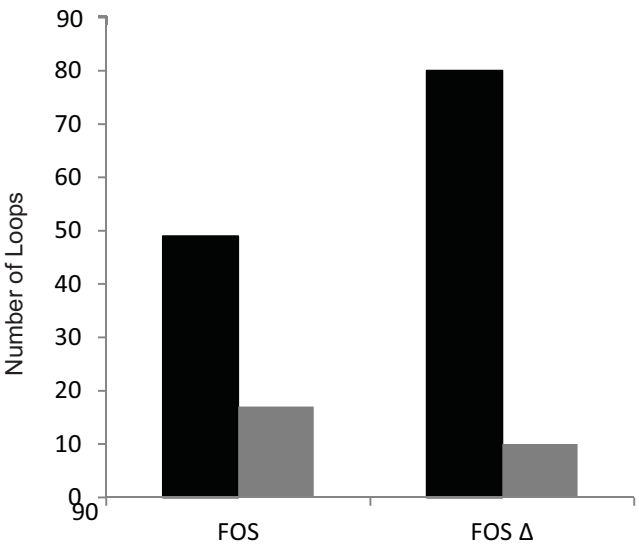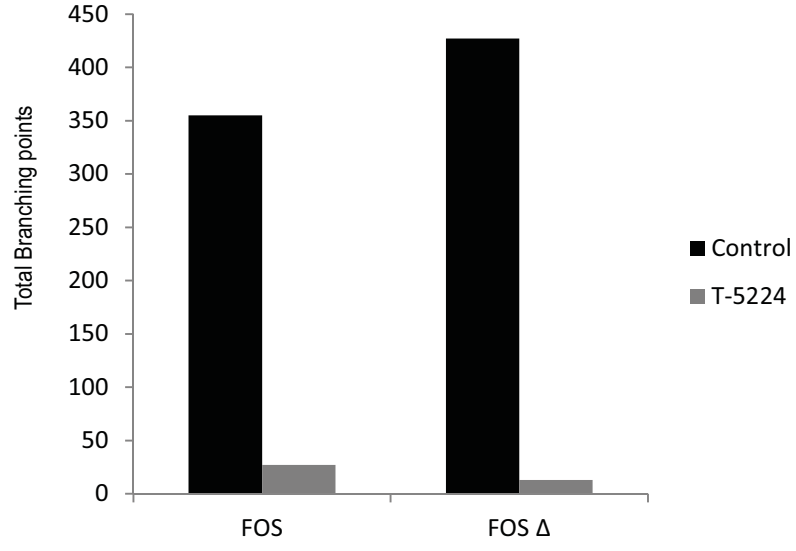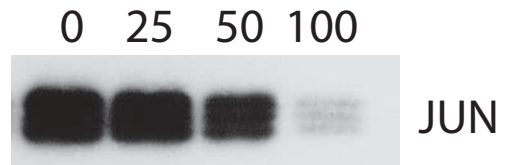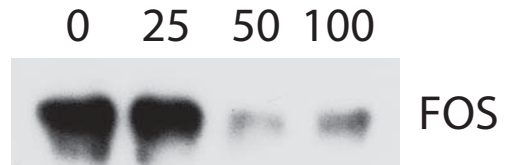

### **Supplementary Figure 1**

FOS $\Delta$  does not interact with the E3 ligase KDM2B. Complexes were immunopurified from cells transfected with the indicated constructs. Western blots were performed as shown.

### **Supplementary Figure 2**

Left Panel: A representative ubiquitin assay of cells transfected with the indicated constructs and cultured in the absence of MG132. Two different shRNA probes per gene were used.

Upper right panel: FOS stability assay. Bottom right panel: Stable knockdown of PSMD2 and PSMD14 in HUVECs was determined by qPCR.

### **Supplementary Figure 3**

HLMVECs ectopically expressing wild type FOS or FOS $\Delta$  were grown on Matrigel. A representative of several independent experiments is shown. Sprouting was quantified after 24 and 48 hours using in-house computer software. FOS expression levels were determined by Western blotting.

### **Supplementary Figure 4**

A ChIP analysis of endogenous FOS association with the indicated promoters in HUVECs treated with or without 50 ng/ml VEGF or 1  $\mu$ M 12-O-Tetradecanoylphorbol-13-acetate (TPA) for 1 hour. Three different primer sets were used for each promoter region. A single representative is shown (all three gave similar results). Results are presented as mean fold changes in recovery (as a fraction of input) relative to an IgG control antibody. Error bars represent the standard deviation (n = 3). Relative endogenous FOS protein levels were determined by Western blotting.

### **Supplementary Figure 5**

HUVECs stably expressing the indicated FOS proteins were grown on Matrigel in the presence or absence of the AP-1 inhibitor, T5224 (20  $\mu$ M). Sprouting was quantified after 24 hours. Lower right panel: T-5224 inhibits AP-1 DNA-binding *in vitro*. A double-stranded oligonucleotide harbouring three consensus AP-1 binding sites was incubated with a combination of FOS and JUN *in vitro* translated proteins in the presence or absence of the indicated concentrations of T-554 ( $\mu$ M). DNA-bound FOS and JUN was detected by Western blotting.
